# A Controlled Trial of Web-Based Diabetes Disease Management

## The MGH Diabetes Primary Care Improvement Project

JAMES B. MEIGS, MD, MPH<sup>1,2</sup>  
ENRICO CAGLIERO, MD<sup>3</sup>  
ANIL DUBEY, MD<sup>4</sup>  
PATRICIA MURPHY-SHEEHY, MPH<sup>1</sup>  
CATHARYN GILDESGAME, MBA<sup>2</sup>

HENRY CHUEH, MD<sup>2,4</sup>  
MICHAEL J. BARRY, MD<sup>1</sup>  
DANIEL E. SINGER, MD<sup>1,2</sup>  
DAVID M. NATHAN, MD<sup>3</sup>

**OBJECTIVE** — To test effects of a web-based decision support tool, the diabetes Disease Management Application (DMA), developed to improve evidence-based management of type 2 diabetes.

**RESEARCH DESIGN AND METHODS** — We conducted a group randomized controlled trial of 12 intervention and 14 control staff providers and 307 intervention and 291 control patients with type 2 diabetes in a hospital-based internal medicine clinic. Providers were randomly assigned from May 1998 through April 1999 to have access to the DMA (intervention) or not to have access (control). The DMA displays interactive patient-specific clinical data, treatment advice, and links to other web-based care resources. We compared patients in the intervention and control groups for changes in processes and outcomes of care from the year preceding the study through the year of the study by intention-to-treat analysis.

**RESULTS** — The DMA was used for 42% of scheduled patient visits. The number of HbA<sub>1c</sub> tests obtained per year increased significantly in the intervention group (+0.3 tests/year) compared with the control group (−0.04 tests/year,  $P = 0.008$ ), as did the number of LDL cholesterol tests (intervention, +0.2 tests/year; control, +0.01 tests/year;  $P = 0.02$ ) and the proportions of patients undergoing at least one foot examination per year (intervention, +9.8%; control, −0.7%;  $P = 0.003$ ). Levels of HbA<sub>1c</sub> decreased by 0.2 in the intervention group and increased by 0.1 in the control group ( $P = 0.09$ ); proportions of patients with LDL cholesterol levels <130 mg/dl increased by 20.3% in the intervention group and 10.5% in the control group ( $P = 0.5$ ).

**CONCLUSIONS** — Web-based patient-specific decision support has the potential to improve evidence-based parameters of diabetes care.

*Diabetes Care* 26:750–757, 2003

**D**iabetes, primarily type 2 diabetes, affects >12% of the adult U.S. population and has become increasingly common over the past decade (1). Patients with type 2 diabetes are affected by microvascular complications, but car-

diovascular disease (CVD) complications take the greatest toll (2). Diabetes and its complications cause substantial loss in quality of life, are the fourth most frequent reason for ambulatory physician visits, and incur >100 billion dollars in

U.S. health care expenditures annually (3–5). There is probably no other common condition with a more pernicious effect than diabetes on patient health and health care budgets.

Fortunately, there is now abundant evidence that complications of diabetes are preventable. Simple screening interventions can prevent visual loss and serious foot lesions (6,7), and intensive control of glycemia, blood pressure, and lipid levels slow the incidence and progression of microvascular and CVD complications (8). This evidence provides the basis for diabetes care guidelines promulgated by the American Diabetes Association (ADA) and other expert panels (9–12). Regrettably, studies consistently document a large gap between evidence-based standards and current diabetes care in the U.S. For instance, only ~50% of diabetic patients have undergone at least one HbA<sub>1c</sub> or total cholesterol test, dilated eye examination, or foot examination per year (13,14).

Barriers to implementation of beneficial interventions can be categorized broadly into physician, patient, and system barriers. Physician barriers include inadequate knowledge of current evidence-based care, lack of awareness of their own performance, or the complexity of interventions in the setting of time constraints (15). Mere publication of guidelines or traditional physician education interventions do not durably improve physician behaviors (16). Computerized decision support systems have potential for physician-level care improvements, especially when used for prompting or writing orders (17). “Disease management” initiatives intended to systematically improve the state of chronic disease care are now widespread (18–24). Some of these initiatives seem successful within health maintenance organization (HMO) settings, but few have been tested in rigorously controlled trials or in settings outside HMOs. Furthermore, most diabetes care improvement studies have focused on prevention of microvascular disease

From the <sup>1</sup>General Medicine Division, Department of Medicine, Harvard Medical School, Boston, Massachusetts; the <sup>2</sup>Clinical Research Program, Harvard Medical School, Boston, Massachusetts; the <sup>3</sup>Diabetes Unit, Department of Medicine, Harvard Medical School, Boston, Massachusetts; and the <sup>4</sup>Laboratory of Computer Science, Department of Medicine, Harvard Medical School, Boston, Massachusetts.

Address correspondence and reprint requests to James B. Meigs, MD, MPH, General Medicine Division, Massachusetts General Hospital, 50 Staniford St., 9th Floor, Boston, MA 02114. E-mail: jmeigs@partners.org. Received for publication 13 May 2002 and accepted in revised form 16 October 2002.

**Abbreviations:** ADA, American Diabetes Association; AMC, Adult Medicine Clinic; CVD, cardiovascular disease; DMA, Disease Management Application; EMR, electronic medical record; HMO, health maintenance organization; ICC, intraclass correlation coefficient.

A table elsewhere in this issue shows conventional and Système International (SI) units and conversion factors for many substances.

See accompanying editorial, p. 942.

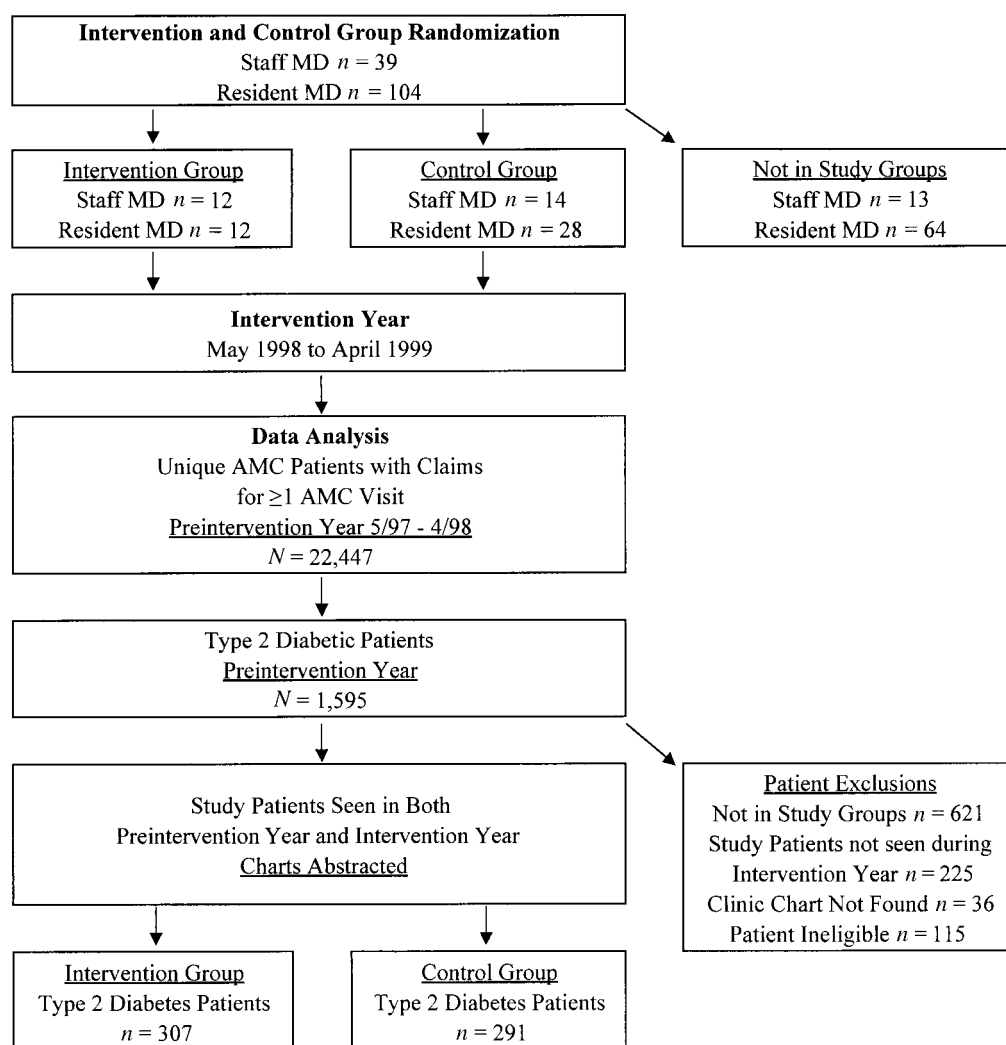

**Figure 1**—Design of the MGH Diabetes Primary Care Improvement Project Intervention Study.

without explicit focus on reduction of CVD risk factors.

To address these issues, we developed a diabetes disease management intervention aimed primarily at physician-level care barriers and intended to improve rates of measurement and reduction in levels of both microvascular and CVD risk factors. The intervention featured a web-based decision support tool, the diabetes Disease Management Application (DMA). In this study, we tested the effectiveness of the DMA with a group randomized controlled trial in a staff-resident primary care medicine practice.

## RESEARCH DESIGN AND METHODS

### Study design

Study providers practiced in a hospital-based staff-resident practice, the Adult

Medicine Clinic (AMC), where 39 staff physicians are divided into three groups. There is little organized interaction between providers in different groups, minimizing potential contamination in group-specific interventions. Staff and residents provide continuity of care for their own patient panels. Residents (and their patients) were members of the same group as their staff preceptor. Staff members were systematically exposed to the intervention, receiving formal preintervention training and two interactive feedback sessions during the intervention year. Residents were made aware of the DMA during an ambulatory training lecture on diabetes care. The AMC uses paper-based medical records and an electronic medical record (EMR; a web-based version of COSTAR [Massachusetts General Hospital, Boston, MA]) (25);

computers with web browsers were available in every patient care room. The study was approved by the MGH/Partners Institutional Review Board.

The study was a group randomized, controlled trial (26); its design is shown in Fig. 1. A coin was tossed to select an intervention group and a control group. The intervention was conducted from May 1998 through April 1999. At the end of the intervention year, patients with at least one visit to the AMC during the preintervention year (May 1997 through April 1998) were identified by billing claims, and patients with type 2 diabetes were identified by ICD-9 codes 250.00–250.90. Of 1,595 patients with diabetes, 997 were excluded, as shown in Fig. 1; 598 patients were included in the study, and their charts were fully abstracted.

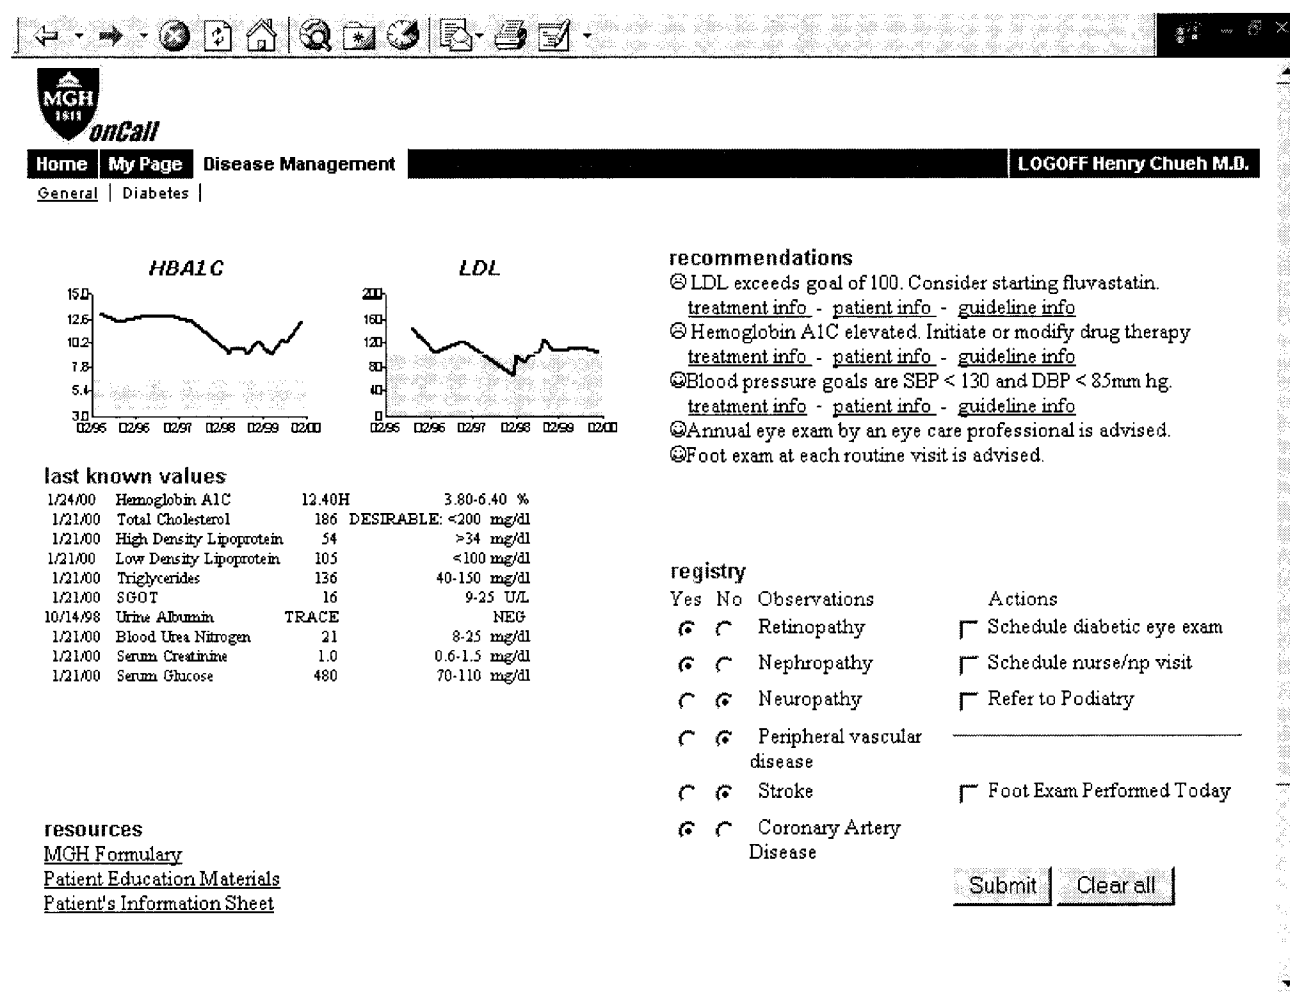

Figure 2—The Diabetes Disease Management Application (DMA) web page.

### Study intervention

The centerpiece of the intervention was a web-based information management/clinical decision support tool, the diabetes DMA. The DMA (Fig. 2) provides a single-screen view of patient-specific information, enabling decision support at the time of patient contact. It displays trended and tabular real-time electronic laboratory data interactively linked to evidence-based treatment recommendations, facilities to aid encounter workflow, and links to additional patient and provider care resources. Treatment recommendations were based on our synthesis of published efficacy data and national guidelines current at the time of the study (9–11). A guideline engine generating patient-specific recommendations used GuideLine Interchange Format (GLIF); data were passed to and from the guideline engine, HTML tables, and a Java graphing applet in XML (eXtensible

Markup Language) format (27,28). The DMA is not an involuntary reminder or prompting system: it must be actively opened, just as any on-line reference or EMR application. During the intervention year, the DMA was available to intervention providers to use if they wished. Control providers continued their usual care practices during the intervention and did not have access to the DMA.

### Study data collection

Clinical data from paper and electronic charts were abstracted by three nurses blinded to group status of providers and patients. Data were abstracted into an electronic database featuring explicit item criteria displayed adjacent to the data entry field. To assess interabstractor variability, all nurses abstracted the same 42 randomly selected charts. κ Statistics or

intraclass correlation coefficients (ICCs) indicated good to excellent agreement for all items: κ during the preintervention year and the intervention year, respectively, were 0.61 and 0.62 for eye examinations, 0.43 and 0.55 for foot examinations, 0.42 and 0.76 for microvascular complications, and 0.68 and 0.72 for CVD complications at baseline; ICCs were 0.94 and 0.81 for systolic blood pressure and 0.96 and 0.93 for diastolic blood pressure during each year. Laboratory data were obtained from hospital electronic databases. We also collected demographic and practice information about staff providers and administered a questionnaire (response rate 67%) to assess their use of practice guidelines.

### Definitions of clinical characteristics

Clinical characteristics were determined from documents such as problem lists

and hospital discharge summaries. We defined characteristic or process measures using explicit criteria. For instance, eye screening was considered to have occurred if the record contained “any mention of eye examinations by an eye care specialist (e.g., ophthalmologists, optometrists), including mention of an eye exam, diabetic eye exam, dilated eye exam, retinal exam, fundus or fundus-copic eye exam, or examination or treatment of retinopathy. . . eye exams performed by primary care providers are NOT considered acceptable eye exams unless there is clear documentation that the patient’s eyes were dilated before the exam, and specific findings, or lack of thereof (e.g., retinal hemorrhage, proliferative retinopathy, macular edema, etc.) are clearly documented.”

Some complications were grouped for descriptive purposes after collection. Aggregate microvascular disease was defined as history of retinopathy, nephropathy, neuropathy, foot ulcer, or amputation. CVD was defined as history of coronary artery disease, stroke, transient ischemic attack, or peripheral vascular disease. Medication lists were abstracted and patients were categorized regarding use of specific classes of therapy (e.g., any lipid-lowering medication). Eye and foot screening were considered to have occurred if any documentation of their provision was found in the record.

### Study outcome measures

Outcome measures included the five diabetes care elements most strongly supported by clinical trials evidence of benefit: change in rates of annual HbA<sub>1c</sub>, LDL cholesterol, blood pressure, and eye and foot screening and change in the absolute values of HbA<sub>1c</sub>, LDL cholesterol, and blood pressure. Change was defined as an increase or decrease in levels or proportions comparing the intervention year to the preintervention year. For HbA<sub>1c</sub>, LDL cholesterol, and blood pressure, the most recent value obtained during the intervention year was compared with the most recent value obtained during the preintervention year. Provider use of the DMA was defined as any use within 1 week of a scheduled patient visit.

### Data analysis

We examined baseline differences in patient and provider characteristics between groups using Student’s *t* tests and  $\chi^2$  tests.

We analyzed outcomes of patients in the intervention group with those in the control group by intention-to-treat. Because the intervention was delivered at the physician level but outcomes were measured at the patient level, we accounted for clustering effects in all analyses. For change in mean levels or numbers of tests per year, we calculated the average level of these outcomes for each provider, averaged this provider average in each group weighted by the number of patients contributed per provider, further adjusted these averages for baseline levels to control for regression to the mean, and evaluated statistical significance using ANOVA models. For change in proportions over time, we used generalized estimating equations assuming compound symmetry for the between- and within-cluster correlation matrix (29). Significance of the preintervention to intervention year change in proportions was tested with a first-order time-by-group interaction term. The cluster size was 24 staff and resident providers in the intervention group and 42 providers in the control group. SAS statistical software (SAS Institute, Cary, NC) was used for all analyses (30) and  $P < 0.05$  was considered statistically significant.

### Power

We estimated the power of the study for change in HbA<sub>1c</sub> levels based on an intraclass correlation of 0.07 to inflate sample size estimates for clustering effects, assuming 80% power to detect differences between groups with a 0.05 two-sided significance level. We further assumed that there would be uniform, consistent use of the DMA in the intervention group. Detection of a 1.0% absolute difference in change in HbA<sub>1c</sub> between groups required 127 patients per group; detection of a 0.5% difference required 486 patients per group.

## RESULTS

### Preintervention characteristics of providers and patients

Baseline staff provider and patient characteristics were similar comparing the intervention group with the control group (Table 1). Providers were a mix of men and women with a wide range of age and panel size. Approximately 7% of provider panels comprised patients with diabetes. Overall, providers believed they were familiar with diabetes management guide-

lines and usually applied them. Baseline patient characteristics were also well balanced between groups. The average study patient was aged in the late sixties, white, and insured by Medicare, with a duration of diabetes of ~10 years. Compared with intervention patients, a greater proportion of control patients were treated with insulin or cholesterol-lowering medications. Hypertension was more prevalent in the patients in the intervention group, and 50% or more patients in both groups had at least one microvascular or CVD complication.

### Effects of the intervention

Preintervention levels of outcome measures and changes at the end of the intervention period are shown in Table 2. During the preintervention year, both groups had similar rates of glycemic and lipid control, but mean diastolic blood pressure was higher and rates of eye and foot screening were lower in the intervention group.

Rates of several process measures were improved with access to the DMA: the number of HbA<sub>1c</sub> and LDL cholesterol tests obtained and proportions of patients with at least one foot examination per year increased modestly but significantly in the intervention group compared with the control group. The intervention had a modest but nonsignificant benefit on glycemic control; HbA<sub>1c</sub> levels tended to improve in the intervention group and worsen in the control group. Lipid control improved in both groups, with somewhat larger but not statistically significant improvements in the intervention group compared with the control group. In the subgroup of patients taking lipid-lowering medication, proportions of intervention group patients with LDL cholesterol <130 mg/dl improved significantly compared with similar control group patients (30% vs. 10% increase, = 0.008). Blood pressure control generally improved slightly in both groups, although mean systolic blood pressure decreased in the control group but increased in the intervention group. Proportions of patients undergoing at least one eye examination per year increased only slightly more in the intervention group than in the control group.

Provider use of the DMA was variable. On average, providers viewed the DMA for 42% of scheduled patient visits. Four of 12 providers (33%) viewed the DMA

Table 1—Baseline characteristics of intervention and control staff providers and patients with type 2 diabetes

|                                                                                 | Intervention | Control   | P value* |
|---------------------------------------------------------------------------------|--------------|-----------|----------|
| Staff providers                                                                 |              |           |          |
| <i>n</i>                                                                        | 12           | 14        | —        |
| Women (%)                                                                       | 33%          | 43%       | 0.6      |
| Mean years since medical school graduation (SD)                                 | 24 (11)      | 19 (9)    | 0.2      |
| Also precept residents (%)                                                      | 33%          | 57%       | 0.2      |
| Nurses, nurse practitioners in group ( <i>n</i> )                               | 3            | 4         | —        |
| Mean number (range) of all patients in panel (SD)                               | 578 (371)    | 505 (246) | 0.6      |
|                                                                                 | 1631–1,284   | 198–1,023 |          |
| Mean number (range) of diabetes patients in panel (SD)                          | 43 (34)      | 34 (18)   | 0.4      |
|                                                                                 | 10–130       | 7–70      |          |
| Mean of total patient panel with diabetes (%)                                   | 7.3%         | 6.8%      | 0.6      |
| Always or usually use EMR for problem or medication lists (%)                   | 60%          | 71%       | 0.5      |
| Very or somewhat familiar with ADA guidelines for care of diabetes patients (%) | 80%          | 86%       | 0.7      |
| Always or usually apply ADA guidelines to care of diabetes patients (%)         | 80%          | 85%       | 0.8      |
| Patients with type 2 diabetes                                                   |              |           |          |
| <i>n</i>                                                                        | 307          | 291       |          |
| Women (%)                                                                       | 55.1         | 49.5      | 0.2      |
| Mean (range) age, years (SD)                                                    | 68 (12)      | 67 (12)   | 0.2      |
|                                                                                 | 25–95        | 34–99     |          |
| Race (%)                                                                        |              |           | 0.04     |
| White                                                                           | 71.0         | 71.1      |          |
| Black                                                                           | 19.2         | 18.9      |          |
| Other                                                                           | 9.8          | 10.0      |          |
| Payor (%)                                                                       |              |           |          |
| Commercial <65                                                                  | 12.4         | 11.0      | 0.2      |
| IIMO <65                                                                        | 17.6         | 19.6      |          |
| Medicare                                                                        | 60.9         | 54.3      |          |
| Medicaid or Other                                                               | 9.2          | 15.1      |          |
| Mean (range) duration of diabetes, years (SD)                                   | 9.9 (5.5)    | 9.7 (5.6) | 0.8      |
|                                                                                 | 3–42         | 3–32      |          |
| Diabetes therapy (%)                                                            |              |           |          |
| Insulin                                                                         | 30.6         | 36.4      | 0.1      |
| Oral hypoglycemic medications                                                   | 60.9         | 63.2      | 0.6      |
| Diet and exercise only                                                          | 17.9         | 10.0      | 0.005    |
| Any lipid-lowering medication (%)                                               | 30.9         | 38.1      | 0.06     |
| Any antihypertensive medication (%)                                             | 79.2         | 79.0      | 1.0      |
| Hyperlipidemia (%)                                                              | 56.4         | 59.8      | 0.4      |
| Hypertension (%)                                                                | 83.1         | 76.0      | 0.03     |
| Smoking (%)                                                                     | 15.6         | 14.8      | 0.8      |
| Any microvascular complication (%)*                                             | 45.3         | 50.2      | 0.2      |
| Any cardiovascular complication (%)†                                            | 52.4         | 50.9      | 0.7      |

Data are *n*, means (SD), range, or proportions as indicated. *P* value = Student's *t* test or  $\chi^2$  test comparing intervention and control groups. \*Microvascular complications include retinopathy, nephropathy, neuropathy, foot ulcer, or amputation; †cardiovascular complications include coronary artery disease, stroke or transient ischemic attack, or peripheral vascular disease.

for >70% of patient visits, 33% of providers used the DMA for 28–30% of patient visits, and 33% of providers used the DMA for 0–17% of patient visits. Nurses and nurse practitioners used the DMA for 0–13% of patient visits. In “treatment received” analyses (comparing control providers with intervention providers who used the DMA for more than the mean number of scheduled patient visits), overall intervention effects were similar to

those found in intention-to-treat analyses (data not shown).

**CONCLUSIONS**— Common sense suggests that computer systems providing interactive patient-specific management support should improve care for complex, data-intensive diseases such as type 2 diabetes, but only limited evidence supports this notion. In this controlled trial, we demonstrated that availability of the

DMA, a web-based information management and decision support interface, led to modest but significant improvements in several evidence-based processes of diabetes care, including increased rates of testing for levels of HbA<sub>1c</sub> and LDL cholesterol and screening for foot disease. Access to the DMA also was associated with nonsignificant improvements in glycemic and lipid control. Although several studies have demonstrated benefits of compu-



Table 2—Primary study outcomes

|                                                                                | Intervention group     |        |        | Control group          |       |        |                 |
|--------------------------------------------------------------------------------|------------------------|--------|--------|------------------------|-------|--------|-----------------|
|                                                                                | Preintervention period |        | Change | Preintervention period |       | Change | <i>P</i> value† |
| Glycemic control outcomes                                                      |                        |        |        |                        |       |        |                 |
| At least one HbA <sub>1c</sub> test in the last 12 months                      | 264                    | 86.0%  | +1.6%  | 256                    | 88.0% | −1.0%  | 0.3             |
| Mean number of HbA <sub>1c</sub> tests/year                                    | 1.7                    | (0.1)  | +0.3   | 1.8                    | (0.1) | −0.04  | 0.008           |
| HbA <sub>1c</sub> <7%                                                          | 51                     | 21.7%  | +1.7%  | 61                     | 26.6% | −2.8%  | 0.2             |
| Mean HbA <sub>1c</sub> (% of hemoglobin)                                       | 8.4                    | (0.1)  | −0.23  | 8.1                    | (0.1) | +0.14  | 0.09            |
| Cholesterol control outcomes                                                   |                        |        |        |                        |       |        |                 |
| At least one LDL cholesterol test, last 12 months                              | 177                    | 57.7%  | +7.2%  | 167                    | 57.4% | +3.4%  | 0.5             |
| Mean number of LDL cholesterol tests/year                                      | 0.8                    | (0.1)  | +0.2   | 0.9                    | (0.1) | +0.01  | 0.02            |
| LDL cholesterol <130 mg/dl                                                     | 62                     | 54.8%  | +20.3% | 78                     | 63.5% | +10.5% | 0.5             |
| Mean LDL cholesterol (mg/dl)                                                   | 126.7                  | (3.1)  | −14.7  | 122.1                  | (3.2) | −9.4   | 0.3             |
| Blood pressure control outcomes                                                |                        |        |        |                        |       |        |                 |
| At least one blood pressure measurement in the last 12 months                  | 299                    | 97.4%  | +1.0%  | 287                    | 98.6% | −1.4%  | 0.3             |
| Blood pressure <130/85 mmHg                                                    | 76                     | 25.4%  | +1.4%  | 79                     | 29.6% | +2.2%  | 0.8             |
| Mean systolic blood pressure (mmHg)                                            | 138.1                  | (1.2)  | +0.8   | 136.9                  | (1.2) | −2.2   | 0.03            |
| Mean diastolic blood pressure (mmHg)                                           | 78.3*                  | (0.6)  | −1.8   | 76.4                   | (0.6) | −0.8   | 0.8             |
| At least one eye examination by an eye-care professional in the last 12 months | 90                     | 29.3%* | +5.5%  | 120                    | 41.2% | +1.7%  | 0.5             |
| At least one foot examination in the last 12 months                            | 201                    | 65.5%* | +9.8%  | 231                    | 82.1% | −0.7%  | 0.003           |

Data are *n* and proportions or means and SE. Proportions and means were adjusted for clustering of patients within providers and weighted by the number of patients per provider. The numbers of physician providers and patients were 24 and 307, respectively, in the intervention group and 42 and 291 respectively, in the control group. \**P* value comparing baseline characteristics between intervention and control groups, *P* < 0.05, etc.; †*P* values test differences between the intervention group and the control group in change in means or proportions from the end of the preintervention to the end of the intervention period. Comparison of change in means was adjusted for clustering, weighted by patients per physician, and further adjusted for baseline mean values. Comparison of change in proportions was adjusted for clustering, was weighted by patients per physician, and tests a first-order time-period-by-group interaction.

ter systems used for prompting or writing orders (17), our study is among the first to suggest possible benefits of an interactive, patient-specific, web-based computer aid to chronic disease management.

Prior research suggests beneficial effects of diabetes disease management programs or computer decision support systems (17–19,22,24,31,32), but lack of rigorous control in many of these studies prevents reliable discrimination of intervention effects from the background secular improvements in levels of HbA<sub>1c</sub>, blood pressure, and lipids occurring nationwide (33–36). The specific benefits of computer aids to diabetes care are gradually becoming rigorously documented. In one controlled trial, Peters and Davidson (23) showed that a comprehensive computerized tracking system led to significant improvements in glycemic and cholesterol control and in several process measures of quality diabetes care in a managed care setting. In a controlled study of provider-oriented, patient-specific diabetes decision support integrated into an EMR, Lobach and Hammond (37) demonstrated improve-

ments in several process outcomes. We demonstrated modest improvements in process outcomes with computerized decision support but also evaluated metabolic outcomes. Process measures are an important element of diabetes care; for instance, increased rates of foot examinations associated with use of the DMA can be expected to lead directly to lower rates of limb-threatening foot lesions in AMC patients with type 2 diabetes (7). However, for metabolic process outcomes, it is improved risk factor levels that lead to reduced risk for complications. For glycemic control, we found suggestive trends in the intervention group in improvement in both HbA<sub>1c</sub> levels, compared with worsening of glycemic control in the control group. From a population perspective, even the small 0.3% absolute difference in HbA<sub>1c</sub> levels that developed between the groups is likely to confer benefit over time (38). Another interpretation of these findings, however, is that improved process outcomes (for instance, increasing HbA<sub>1c</sub> testing rates) do not necessarily equate with improved metabolic control (for instance, lower HbA<sub>1c</sub>

levels). This distinction merits emphasis, because most current quality standards focus only on measuring and rewarding improvements in process (12).

Our study has several limitations. Low rates of some diabetes care activities in study practices may have been a function of incomplete (and then improved) documentation rather than inadequate (and then improved) delivery of care (39). However, for purposes of accountability, improved documentation is equivalent to improved care delivery. We also lacked substantive patient surveillance and self-care interventions; diabetes is a public health problem in which self-care is a major locus of disease control, but many patients remain only loosely affiliated with their primary care setting (40). Whether embedding the DMA within a larger program designed to enhance population surveillance and patient self-care might lead to even better patient outcomes is a focus of ongoing research (41). Finally, use of the DMA was variable and inconsistent among providers, contributing to its relatively modest effects. Based on poststudy feedback from intervention

group providers, barriers to use included lack of integration into workflow (the DMA was not an obligatory prompting or reminder system), time pressure during the clinical encounter, the fact that diabetes was only one of many chronic problems to manage in a typical primary care encounter, and the belief among some providers that use of computers during an encounter is a barrier to effective patient-doctor communication. The fact that the DMA had any impact at all suggests that if these barriers can be addressed, web-based patient-specific decision support has the potential to produce more substantial improvements in patient outcomes.

The methods and findings of our intervention are potentially generalizable. The study was conducted in a pluralistic, mixed-payor group practice different than the highly integrated managed care settings in which most care improvement research has usually been conducted (18,19,22,23,31). The informatics architecture underlying the DMA is adaptable to local medical data sources and guideline implementations. The DMA is viewed with a web browser, and thus on virtually any computer, and while it can be integrated into existing medical record systems, it can also be used as a stand-alone clinical tool much like other web-based patient care resources.

Improving type 2 diabetes care is an important challenge. Excellent evidence of treatment efficacy has not been translated into effective care for many patients. From a provider perspective, the number and complexity of treatment goals, therapeutic interventions, and testing and screening requirements represent important barriers to delivery of comprehensive, high-quality care. In this controlled study, we demonstrated that web-based, patient-specific, interactive decision support has the potential to improve elements of care known to lead directly to reduced morbidity and mortality in type 2 diabetes.

**Acknowledgments**—This study was supported by a grant from the National Pharmaceutical Council and by the MGH Primary Care Operations Improvement and Clinical Research Programs. Funds for dissemination of results were also provided by Aventis Pharmaceuticals. J.B.M. received support from an American Diabetes Association clinical research grant and a junior faculty development grant from SmithKline Beecham.

We thank Barbara White for assistance with DMA training and provider usage supervision, Jo Ann David-Kasdan, RN, MS, for assistance with data abstraction and management, and Yuchiao Chang, PhD, for assistance with design of the statistical analysis.

## References

- Mokdad AH, Ford ES, Bowman BA, Nelson DE, Engelgau MM, Vinicor F, Marks JS: Diabetes trends in the U.S.: 1990–1998. *Diabetes Care* 23:1278–1283, 2000
- Nathan DM, Meigs JB, Singer DE: The epidemiology of cardiovascular disease in type 2 diabetes mellitus: how sweet it is, or is it? *Lancet* 350 (Suppl. 1):4–9, 1997
- UK Prospective Diabetes Study Group: Quality of life in type 2 diabetic patients is affected by complications but not by intensive policies to improve blood glucose or blood pressure control (UKPDS 37). *Diabetes Care* 22:1125–1136, 1999
- Harris MI: Ambulatory medical care for diabetes. In *Diabetes in America: Diabetes Data Compiled 1984*. Group NDD. Washington, DC, US Govt. Printing Office, 1985 (NIH publ. no. 85–1468)
- American Diabetes Association: Economic consequences of diabetes mellitus in the US in 1997. *Diabetes Care* 21:296–309, 1998
- Singer D, Nathan D, Fogel H, Schachat A: Screening for diabetic retinopathy. *Ann Intern Med* 116:660–671, 1992
- Litzelman DK, Slemenda CW, Langefeld CD, Hayes LM, Welch MA, Bild DE, Ford ES, Vinicor F: Reduction of lower extremity clinical abnormalities in patients with non-insulin-dependent diabetes mellitus: a randomized, controlled trial. *Ann Intern Med* 119:36–41, 1993
- Meigs JB: Cardiovascular disease risk and evidence-based risk reduction in type 2 diabetes. *Clin Geriatr Med* 8:109–117, 2000
- American Diabetes Association: Clinical practice recommendations 1998. *Diabetes Care* 21 (Suppl. 1):S1–S98, 1998
- National Cholesterol Education Program: Second Report of the Expert Panel on Detection, Evaluation, and Treatment of High Blood Cholesterol in Adults (Adult Treatment Panel II). Washington, DC, US Govt. Printing Office, 1993 (NIH publ. no. 93–3095)
- Joint National Committee on Prevention, Detection, Evaluation, and Treatment of High Blood Pressure: The sixth report of the Joint National Committee on Prevention, Detection, Evaluation, and Treatment of High Blood Pressure. *Arch Intern Med* 157:2413–2446, 1997
- Health Care Financing Administration: Quality of care: national projects: Diabetes Quality Improvement Project (DQIP) [article online], 2000. Available from <http://www.dqip.org>
- Meigs JB, Stafford RS: Cardiovascular disease prevention practices by U.S. physicians for patients with diabetes. *J Gen Intern Med* 15:220–228, 2000
- Centers for Disease Control and Prevention: Levels of diabetes-related preventive-care practices: United States, 1997–1999. *MMWR* 49:954–958, 2000
- Greco PJ, Eisenberg JM: Changing physicians' practices. *N Engl J Med* 329:1271–1274, 1993
- Bero L, Grilli R, Grimshaw J, Harvey E, Oxman A, Thomson M: Closing the gap between research and practice: an overview of systematic reviews of interventions to promote the implementation of research findings. *BMJ* 317:465–468, 1998
- Hunt D, Haynes R, Hanna S, Smith K: Effects of computer-based clinical decision support systems on physician performance and patient outcomes: a systematic review. *JAMA* 280:1339–1346, 1998
- Friedman NM, Gleeson JM, Kent MJ, Foris M, Rodriguez DJ, Cypress M: Management of diabetes mellitus in the Lovelace Health Systems' EPISODES OF CARE program. *Eff Clin Pract* 1:5–11, 1998
- Petitti DB, Contreras R, Ziel FH, Dudl J, Domurat ES, Hyatt JA: Evaluation of the effect of performance monitoring and feedback on care process, utilization, and outcome. *Diabetes Care* 23:192–196, 2000
- Wagner EH, Grothaus LC, Sandhu N, Galvin MS, McGregor M, Artz K, Coleman EA: Chronic care clinics for diabetes in primary care: a system-wide randomized trial. *Diabetes Care* 25:695–700, 2001
- Aubert R, Herman W, Waters J, Moore W, Sutton D, Peterson B, Bailey C, Koplan J: Nurse case management to improve glycemic control in diabetic patients in a health maintenance organization. *Ann Intern Med* 129:605–612, 1998
- Clark CM Jr, Snyder JW, Meek RL, Stutz LM, Parkin CG: A systematic approach to risk stratification and intervention within a managed care environment improves diabetes outcomes and patient satisfaction. *Diabetes Care* 24:1079–1086, 2001
- Peters AL, Davidson MB: Application of a diabetes managed care program: the feasibility of using nurses and a computer system to provide effective care. *Diabetes Care* 21:1037–1043, 1998
- Sidorov J, Shull R, Tomcavage J, Girolami S, Lawton N, Harris R: Does diabetes disease management save money and improve outcomes: a report of simultaneous short-term savings and quality improvement associated with a health maintenance organization-sponsored disease management program among patients

- fulfilling health employer data and information set criteria. *Diabetes Care* 25:684–689, 2002
25. Rabbani U, Morgan M, Barnett O: A COSTAR interface using WWW technology. *Proc AMIA Symp* 703–707, 1998
  26. Beach ML: Primer on group randomized trials. *Eff Clin Pract* 4:42–43, 2001
  27. Dubey AK, Chueh H: Using the extensible markup language (XML) in automated clinical practice guidelines. *Proc AMIA Symp* 735–739, 1998
  28. Dubey AK, Chueh HC: An XML-based format for guideline interchange and execution. *Proc AMIA Symp* 205–209, 2000
  29. Zeger SL, Liang K-Y: Longitudinal data analysis for discrete and continuous outcomes. *Biometrics* 42:121–130, 1986
  30. SAS Institute: *SAS/STAT User's Guide: Version 6*. 4th ed. Cary, NC, SAS Institute, 1989
  31. McCullough D, Price M, Hindmarch M, Wagner E: A population-based approach to diabetes management in a primary care setting: early results and lessons learned. *Effect Clin Pract* 1:12–22, 1998
  32. Smith S, Murphy M, Huschka T, Dineen SF, Gorman C, Zimmerman B, Rizza R, Maessens J: Impact of a diabetes electronic management system on the care of patients seen in a subspecialty diabetes clinic. *Diabetes Care* 21:972–976, 1998
  33. Nathan D, McKittrick C, Larkin M, Schaffran R, Singer D: Glycemic control in diabetes mellitus: have changes in therapy made a difference. *Am J Med* 100:157–163, 1996
  34. Posner BM, Franz MM, Quatromoni PA, Gagnon DR, Sytkowski PA, D'Agostino RB, Cupples LA: Secular trends in diet and risk factors for cardiovascular disease: the Framingham Study. *J Am Diet Assoc* 95:171–179, 1995
  35. Iribarren C, Luepker RV, McGovern PG, Arnett DK, Blackburn H: Twelve-year trends in cardiovascular disease risk factors in the Minnesota Heart Survey: are socioeconomic differences widening? *Arch Intern Med* 157:873–881, 1997
  36. Bild DE, Jacobs DR, Liu K, Williams OD, Hilner JE, Perkins LL, Marcovina SM, Hulley SB: Seven-year trends in plasma low-density-lipoprotein-cholesterol in young adults: the CARDIA Study. *Ann Epidemiol* 6:235–245, 1996
  37. Lobach DF, Hammond WE: Development and evaluation of a computer-assisted management protocol (CAMP): improved compliance with care guidelines for diabetes mellitus. *Proc Annu Symp Comput Appl Med Care* 787–791, 1994
  38. UK Prospective Diabetes Study Group: Intensive blood-glucose control with sulphonylureas or insulin compared with conventional treatment and risk of complications in patients with type 2 diabetes (UKPDS 33). *Lancet* 352:837–853, 1998
  39. Luck J, Peabody JW, Dresselhaus TR, Lee M, Glassman P: How well does chart abstraction measure quality: a prospective comparison of standardized patients with the medical record. *Am J Med* 108:642–649, 2000
  40. Glasgow RE, Wagner EH, Kaplan RM, Vinicor F, Smith L, Norman J: If diabetes is a public health problem, why not treat it as one: a population-based approach to chronic illness. *Ann Behav Med* 21:159–170, 1999
  41. Grant RG, Meigs JB: The use of computers in population-based diabetes management. *J Clin Outcomes Management* 9:390–396, 2002
